# Supplementary material for: Gag Virus-like Particles Functionalized with SARS-CoV-2 Variants: Generation, Characterization and Recognition by COVID-19 Convalescent Patients’ Sera
Source: MDPI journal article supplement (doi:10.3390/vaccines11111641), 2023-10-26
Supplement: s1 [file s1]

**Figure S1.** Confocal microscopy images. Spike (red), Gag (green), nuclei (blue)

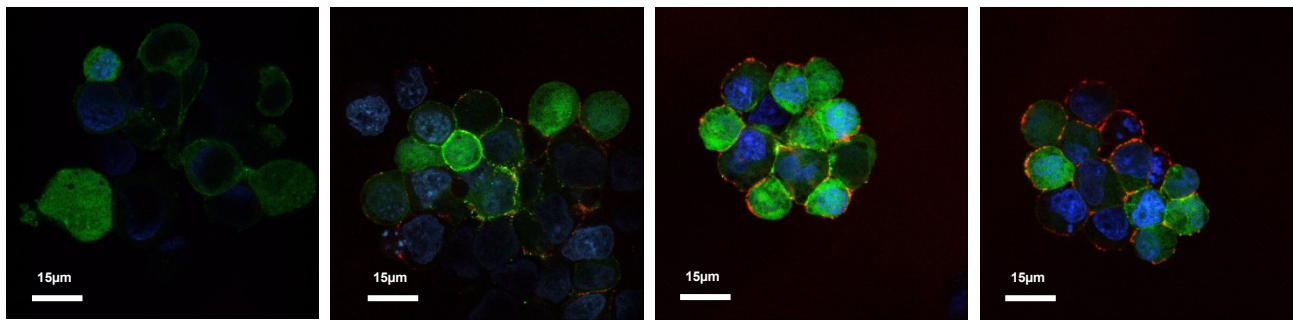

**Figure S2.** Spike Dot Blot uncropped membrane

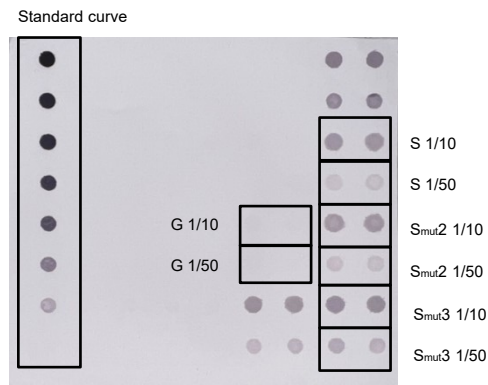

**Figure S3.** Transmission Electron Microscopy (TEM) of the purified VLPs.

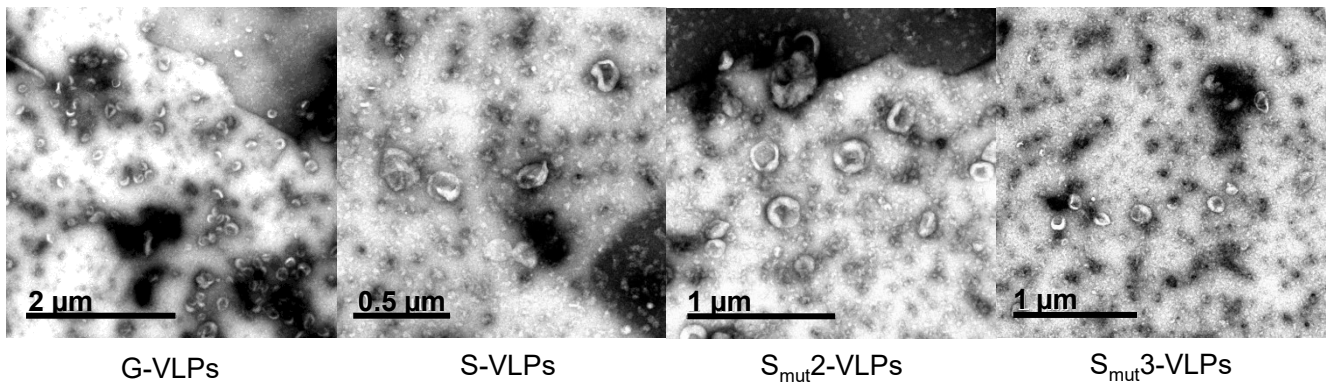

**Table S1.** Summary of positive and negative sera samples. Their antibody levels against SARS-CoV-2 are indicated in arbitrary units (AU) per mL.

| Code | Antibody positivity<br>against SARS-CoV-2 (AU/mL) | Code | Antibody positivity<br>against SARS-CoV-2 (AU/mL) |
|------|---------------------------------------------------|------|---------------------------------------------------|
| 1-   | 2.5 (negative)                                    | 1+   | 4046.4                                            |
| 2-   | 8.1 (negative)                                    | 2+   | 307.5                                             |
| 3-   | 1.1 (negative)                                    | 3+   | 214.21                                            |
| 4-   | 0.1 (negative)                                    | 4+   | 98.6                                              |
|      |                                                   | 5+   | 105.7                                             |
|      |                                                   | 6+   | 135.1                                             |
|      |                                                   | 7+   | 427.3                                             |
|      |                                                   | 8+   | 132.8                                             |
